# Supplementary material for: Development and Laboratory Scalability of Ultraviolet-Activated Silica-Based Granular Media as an Engineered System for the Degradation of Per- and Polyfluoroalkyl Substances in Concentrated Liquid Waste
Source: Atypon-hosted journal article supplement (doi:10.1061/joeedu.eeeng-7228), 2023-06-29
Supplement: supplemental_materials_joeedu.eeeng-7228_mcintyre.pdf [file supplemental_materials_joeedu.eeeng-7228_mcintyre.pdf]

## SUPPLEMENTAL MATERIALS

*ASCE Journal of Environmental Engineering*

# Development and Laboratory Scalability of Ultraviolet-Activated Silica-Based Granular Media as an Engineered System for the Degradation of Per- and Polyfluoroalkyl Substances in Concentrated Liquid Waste

Hannah McIntyre, Vidit Minda, Elisabeth Hawley, Rula Deeb, and  
Megan Hart

**DOI:** 10.1061/JOEEDU.EEENG-7228

© ASCE 2023

[www.ascelibrary.org](http://www.ascelibrary.org)

## Section S1. Reagent Grade Solutions and Standards

Silica-based granular media was synthesized with tetraethyl orthosilicate (CAS: 78-10-4, Thermo Fisher Scientific), silicic acid (CAS: 1343-98-2, Sigma Aldrich), sodium hydroxide (CAS: 1310-73-2, Sigma Aldrich), and either titanium (IV) oxide, Aeroxide® P25, ACROS Organics (CAS: 13463-67-7, Thermo Fisher Scientific) or Bismuth (III) oxide (CAS: 1304-76-3, Thermo Fisher Scientific). The bismuth trioxide variation utilized nitric acid (CAS: 7697-37-2, Thermo Fisher Scientific). Perfluorooctanesulfonic acid – 1H, 1H, 2H, 2H (CAS: 27619-97-2, Synquest Laboratories), perfluorooctanesulfonic acid (CAS: 6164-3-08, Synquest Laboratories), perfluorohexanesulfonic acid (CAS: 3871-99-6, Sigma Aldrich), perfluorobutanesulfonic acid (CAS: 375-73-5), perfluorononanoic acid (CAS: 375-95-1, Alfa Aesar), perfluorooctanoic acid (CAS: 335-67-1, Sigma Aldrich), perfluoroheptanoic acid (CAS: 375-85-9, Thermo Fisher Scientific), perfluorohexanoic acid (CAS: 307-24-4, Thermo Fisher Scientific), perfluoropentanoic acid (CAS: 2706-90-3, Thermo Fisher Scientific), and perfluorobutanoic acid (CAS: 375-22-4, Sigma Aldrich) were purchased for PFAS spiked deionized water solutions. Sodium hydroxide (CAS: 1310-73-2, Sigma Aldrich) and sulfuric acid (CAS: 7664-93-9, Thermo Fisher Scientific) were purchased for experimental amendments. Technical grade methanol (CAS: 67-56-1, Thermo Fisher Scientific) was purchased for reactor cleaning and rinsing, along with deionized water.

Dionex AS23 eluent concentrate and Dionex combined seven anion standard II were purchased from Thermo Fisher Scientific for ion chromatography. LC/MS grade water (Cat no: W6-1, Thermo Fisher Scientific), ACS grade methanol (Cat no: A412-1, Thermo Fisher Scientific), LC/MS grade acetonitrile (Cat no: LC015-1, Honeywell), LC/MS grade ammonium acetate (CAS: 631-61-8, Sigma Aldrich) and LC/MS grade acetic acid (CAS: 64-19-7, Sigma Aldrich) were purchased for LC-MS sample preparation and analysis. Wellington standards MPAC MXA and MPFAC-24ES were purchased for internal standards. Wellington PFAC30PAR was purchased for the calibration mix.

**Table S1.** PFAS Mix Analytes

| <b>PFAS Analyte</b> | <b>Concentration (mg/L)</b> |
|---------------------|-----------------------------|
| PFOS                | 4.53                        |
| PFNA                | 5.73                        |
| 6:2 FTS             | 1.27                        |
| PFOA                | 4.27                        |
| PFHxS               | 4.87                        |
| PFHpA               | 5.07                        |
| PFHxA               | 9.33                        |
| PFPeA               | 8.67                        |
| PFBA                | 5.2                         |
| <b>Total</b>        | <b>48.93</b>                |

## Section S2 Reactor Configurations

**Table S2.** UV Lamp Parameters

| Lamp Wattage | Radiation Flux at 254 nm (W) | Irradiance at 254 nm ( $\mu\text{W}/\text{cm}^2$ ) | Radiation Flux at 185 nm (W) |
|--------------|------------------------------|----------------------------------------------------|------------------------------|
| 21           | 7.2                          | 72                                                 | -                            |
| 48           | 12                           | 120                                                | 2.4                          |
| 57           | 13                           | 130                                                | -                            |
| 85           | 23                           | 230                                                | 6                            |

### Equation 1. Residence Time

- Residence Time =  $\frac{\text{Total Treatment Time}}{(\text{Total Volume} / \text{Reactor Volume})}$

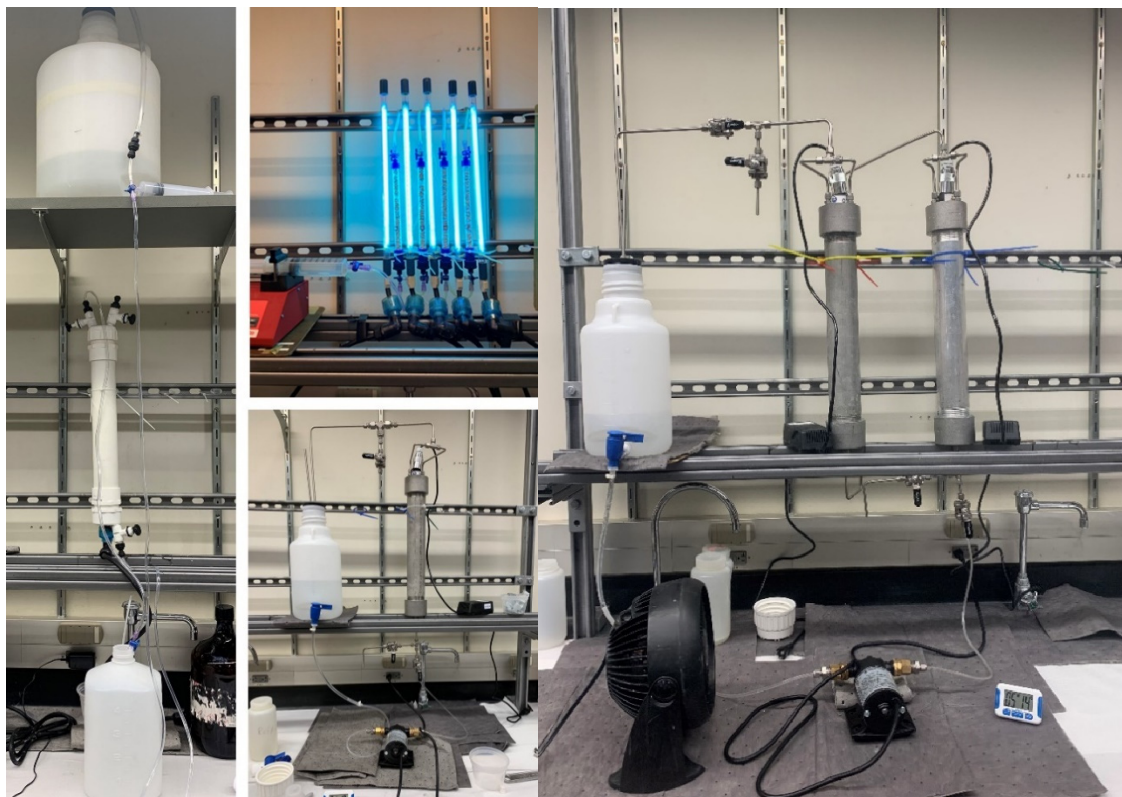

**Figure S1.** Photographs of various column reactor configurations used for scalability assessment including the flow-through reactor, mini-column reactor, recirculation reactor, and modified recirculation reactor.

### Section S3. LC-MS Analysis

**Table S3.** Gradient

| Time (minutes) | Concentration of Channel A (%) | Concentration of Channel B (%) |
|----------------|--------------------------------|--------------------------------|
| 0              | 95                             | 5                              |
| 5              | 95                             | 5                              |
| 6.5            | 75                             | 25                             |
| 19             | 20                             | 80                             |
| 19.5           | 5                              | 95                             |
| 20.5           | 5                              | 95                             |
| 21             | 95                             | 5                              |
| 25             | 95                             | 5                              |

**Table S4.** LC-MS Parameters

|                              |                                             |           |
|------------------------------|---------------------------------------------|-----------|
| LC System                    | Shimadzu Nexera XR (40-Series) UHPLC System |           |
|                              | System Controller                           | SCL-40    |
|                              | Degassing Unit                              | DGU-405   |
|                              | Pump                                        | LC-40DX3  |
|                              | Autosampler                                 | SIL-40CX3 |
|                              | Column Oven                                 | CTO-40C   |
| Autosampler Temperature      | 4 °C                                        |           |
| Column Oven Temperature      | 40 °C                                       |           |
| MS Instrument                | Shimadzu 9030 Q-TOF                         |           |
| m/z Range                    | 40-1000                                     |           |
| Acquisition Time             | 25 minutes                                  |           |
| Event Time                   | 0.5 second                                  |           |
| Threshold                    | Low                                         |           |
| Interface Voltage            | -5.00 kV                                    |           |
| Corona Needle Voltage        | -4.50 kV                                    |           |
| Ionization Interface         | Dual Ion Source (DUIS)                      |           |
| Nebulizing Gas Flow          | 2 L/minute                                  |           |
| Heating Gas Flow             | 10 L/minute                                 |           |
| Interface Temperature        | 175 °C                                      |           |
| Drying Gas Flow              | 10 L/minute                                 |           |
| Desolvation Line Temperature | 250 °C                                      |           |
| Heat Block Temperature       | 400 °C                                      |           |

**Table S5.** Method Limit of Detection

| Analyte | MDL (ng/L) |
|---------|------------|
| PFBA    | 950        |
| PFPenA  | 400        |
| PFHexA  | 400        |
| PFHepA  | 400        |
| PFOA    | 400        |
| PFNA    | 400        |
| PFBS    | 250        |
| PFHexS  | 250        |
| PFOS    | 250        |
| 6:2 FTS | 100        |

\*Please note this is the limit of the detection for the method and column used and not what the instrument is capable of.

#### Section S4. Ion Chromatography Analysis

The Dionex ion chromatography system (ICS-90) was coupled with an automated sampler (AS40). ICS-90 system contained a 4× 250-mm AS23 analytical standard bore column (part #064149), an AG23 guard

standard column (064147), coupled with an AMMS 300 chemically driven suppressor (064558), and a D5 stabilizer conductivity cell. A 50  $\mu$ L injection loop was used as a standard for all samples and standards. Chromeleon 6.80 was the software used for analysis.

## Section S5. Additional Data

### Batch Reactor

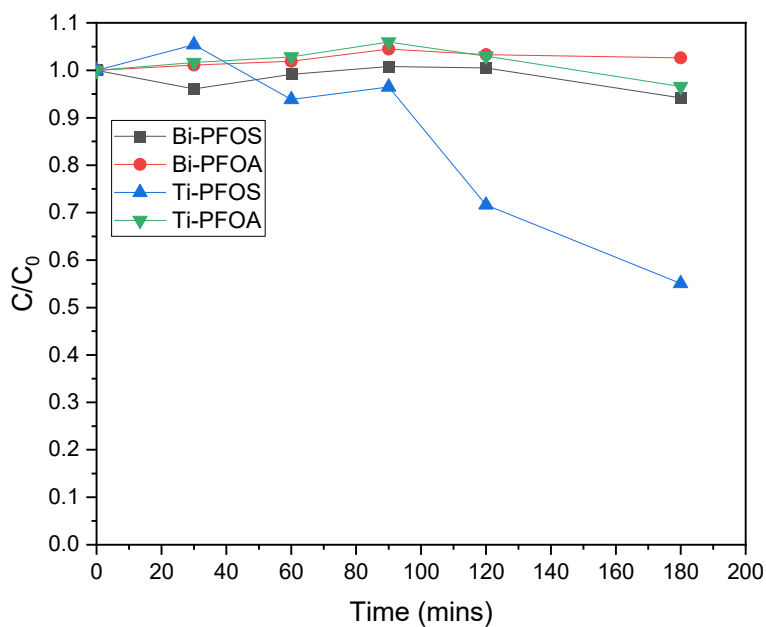

**Figure S2.** Ti-SGM and Bi-SGM batch reactors, No UV (adsorption control), no amendment

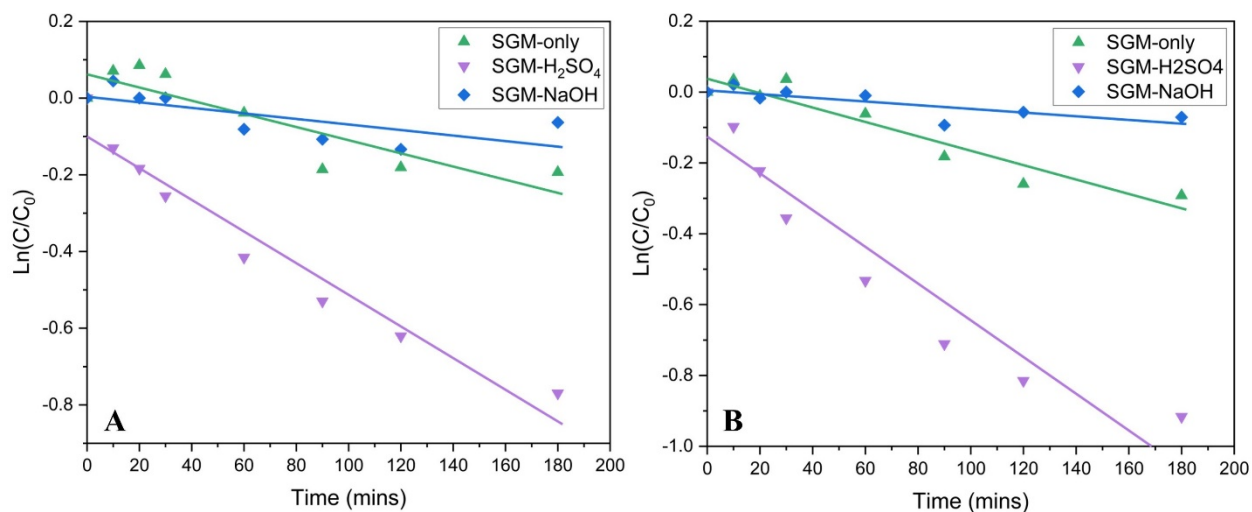

**Figure S3.** Degradation kinetics of UV/SGM batch reactors under various pH conditions

**Table S6.** Ti-SGM and Bi-SGM Reactor Kinetics

| <b>Treatment</b>                      | <b><math>\ln(C/C_0) = kt + b</math></b> | <b>R<sup>2</sup></b> | <b>k (min<sup>-1</sup>)</b> |
|---------------------------------------|-----------------------------------------|----------------------|-----------------------------|
| Ti-SGM-Only                           | $\ln(C/C_0) = -0.002t + 0.062$          | 0.77                 | -0.002                      |
| Bi-SGM-Only                           | $\ln(C/C_0) = -0.002t + 0.038$          | 0.91                 | -0.002                      |
| Ti-SGM-H <sub>2</sub> SO <sub>4</sub> | $\ln(C/C_0) = -0.004t - 0.10$           | 0.95                 | -0.004                      |
| Bi-SGM-H <sub>2</sub> SO <sub>4</sub> | $\ln(C/C_0) = -0.005t - 0.13$           | 0.91                 | -0.005                      |
| Ti-SGM-NaOH                           | $\ln(C/C_0) = -0.0007t + 0.0036$        | 0.52                 | -0.0007                     |
| Bi-SGM-NaOH                           | $\ln(C/C_0) = -0.0005t + 0.0048$        | 0.65                 | -0.0005                     |

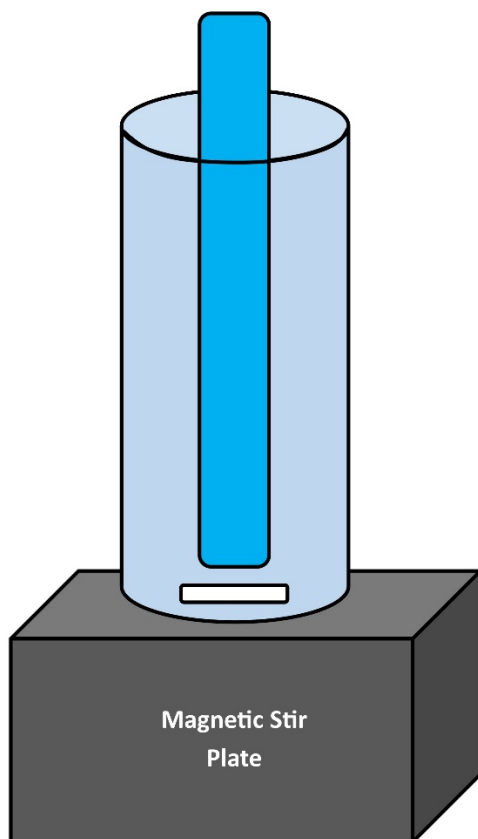

**Figure S4.** UVC/VUV experimental reactor

**Table S7.** Reactor Configuration Kinetics

| Reactor Configuration | $\ln(C/C_0) = kt + b$         | $R^2$ | $k$ ( $\text{min}^{-1}$ ) |
|-----------------------|-------------------------------|-------|---------------------------|
| Batch Reactor         | $\ln(C/C_0) = -0.0041t - 0.1$ | 0.95  | -0.0041                   |
| Flow-Through Reactor  | $\ln(C/C_0) = -0.017t - 0.1$  | 0.92  | -0.017                    |
| Recirculation Reactor | $\ln(C/C_0) = -0.0069t - 0.1$ | 0.88  | -0.0069                   |

***Modified Recirculation Reactor***



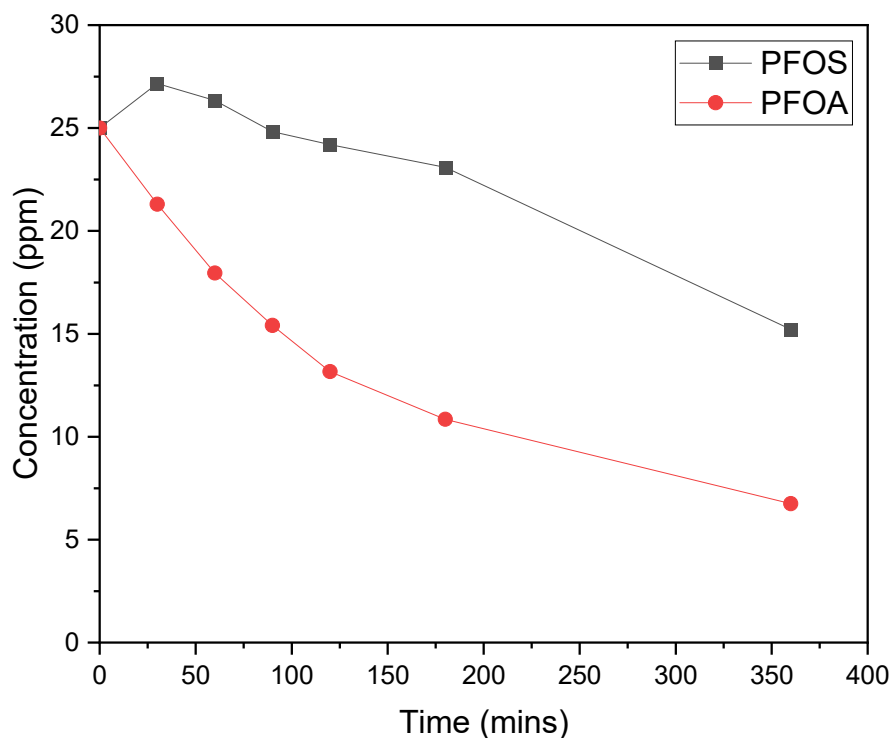

**Figure S5.** Degradation of PFOS/PFOA solution in the recirculation reactor with two 85-Watt lamp columns in series and 5% H<sub>2</sub>SO<sub>4</sub> amendment. One column was packed with SGM and the other column contained no SGM (photolysis only column).

**Table S8.** Comparison of treatment type on PFOS and PFOA degradation with the recirculation reactor at 180 minutes

| Treatment Type                     | PFOS | PFOA | Total PFOS/PFOA |
|------------------------------------|------|------|-----------------|
| Photocatalysis – Acidic            | 64%  | 70%  | 67%             |
| Photocatalysis – Basic             | 60%  | 35%  | 48%             |
| Photolysis - Acidic                | 22%  | 86%  | 54%             |
| Photolysis - Basic                 | 13%  | 75%  | 44%             |
| Photocatalysis/Photolysis - Acidic | 40%  | 74%  | 57%             |
| Photocatalysis/Photolysis - Basic  | 61%  | 85%  | 73%             |

**Equation 2. EE/O Calculation**

$$EE / O = \frac{P}{-\log(C/C_0) \left(\frac{V}{t}\right) (3600)}$$

Where:

EE/O – electrical energy per log order reduction (kWh/m<sup>3</sup>)

P – power/wattage of UV lamp(s) (kW),

C/C<sub>0</sub> – ratio of PFAS removal, specified as individual or total

V – treated volume (m<sup>3</sup>)

t – time (s)

**Table S9. UV/SGM scenarios for linear treatment scale-up**

| Scenario  | Treatment Volume | Number of Columns | Lamps per Column | Wattage per Lamp | Total Wattage |
|-----------|------------------|-------------------|------------------|------------------|---------------|
| Real      | 1.3              | 1                 | 1                | 85               | 85            |
| Projected | 100              | 76                | 1                | 85               | 6460          |
| Projected | 100              | 38                | 1                | 155              | 5890*         |
| Projected | 100              | 10                | 4                | 155              | 6200          |

\*By doubling the length of the column, a reduction of 570 watts could be achieved considering the longer lamps have a slightly lower wattage but an 8% higher UVC/VUV output

**Table S10. Comparison of pilot demonstrations for the degradation of PFAS against UV/SGM.**

Values are linearly extrapolated from the experimental results to treat 100 gallons of solution to give a comparison baseline.

| Treatment Technology      | Real             |         |                        |          |                  | Projected                    |                     |
|---------------------------|------------------|---------|------------------------|----------|------------------|------------------------------|---------------------|
|                           | Volume (Gallons) | Wattage | Treatment Time (hours) | Flowrate | PFAS Removed (%) | Volume Projected (Projected) | Wattage (Projected) |
| UV/SGM                    | 1.3              | 85      | 24                     | 3.8      | 93               | 100 Gallons                  | 6,460               |
| UV/Sulfite                | 15.6             | 1,320   | 23                     | 3.8      | 97               | 100 Gallons                  | 8,461               |
| Electrochemical Oxidation | 5                | 300     | 80                     | 1        | 99*              | 100 Gallons                  | 6,000               |

\*PFOS Only
